# Supplementary material for: Effect of Physician Gender and Race on Simulated Patients’ Ratings and Confidence in Their Physicians: A Randomized Trial
Source: PubMed Central journal article supplement (PMC7043197; doi:10.1001/jamanetworkopen.2019.20511), 2020-02-21
Supplement: jamanetwopen-3-e1920511-s003.pdf [file jamanetwopen-3-e1920511-s003.pdf]

## Data Sharing Statement

Solnick. Effect of Physician Gender and Race on Simulated Patients' Ratings and Confidence in Their Physicians: A Randomized Trial. *JAMA Netw Open*. Published February 21, 2020.  
10.1001/jamanetworkopen.2019.20511

**Data available:** Yes

**Data types:** Deidentified participant data

**How to access data:** Data will be available at Harvard Dataverse.  
<https://doi.org/10.7910/DVN/GUAFU0>

**When available:** With publication

**Document types:** Statistical/analytic code

**How to access documents:** <https://doi.org/10.7910/DVN/GUAFU0>

**When available:** With publication

**Who can access the data:** Anyone with access to the internet.

**Types of analyses:** Replication of all statistical analyses reported in the paper and eMethods

**Mechanisms of data availability:** Not applicable. No restrictions will be placed on data access.
